# Supplementary material for: Heterogeneity in hydrophobic deep eutectic solvents: SAXS prepeak and local environments
Source: Royal Society of Chemistry journal article supplement (doi:10.1039/d0cp05407k), 2021-01-01
Supplement: d0cp05407k1.pdf [file d0cp05407k1.pdf]

**Electronic Supplementary Information**  
**for**  
**Heterogeneity in Hydrophobic Deep Eutectic**  
**Solvents: SAXS Prepeak and Local Environments**

Akshay Malik and Hemant K. Kashyap\*

*Department of Chemistry, Indian Institute of Technology Delhi, Hauz Khas, New Delhi*  
*110016, India*

E-mail: [hkashyap@chemistry.iitd.ac.in](mailto:hkashyap@chemistry.iitd.ac.in)

Phone: +91-(0)11-26591518. Fax: +91-(0)11-26581102

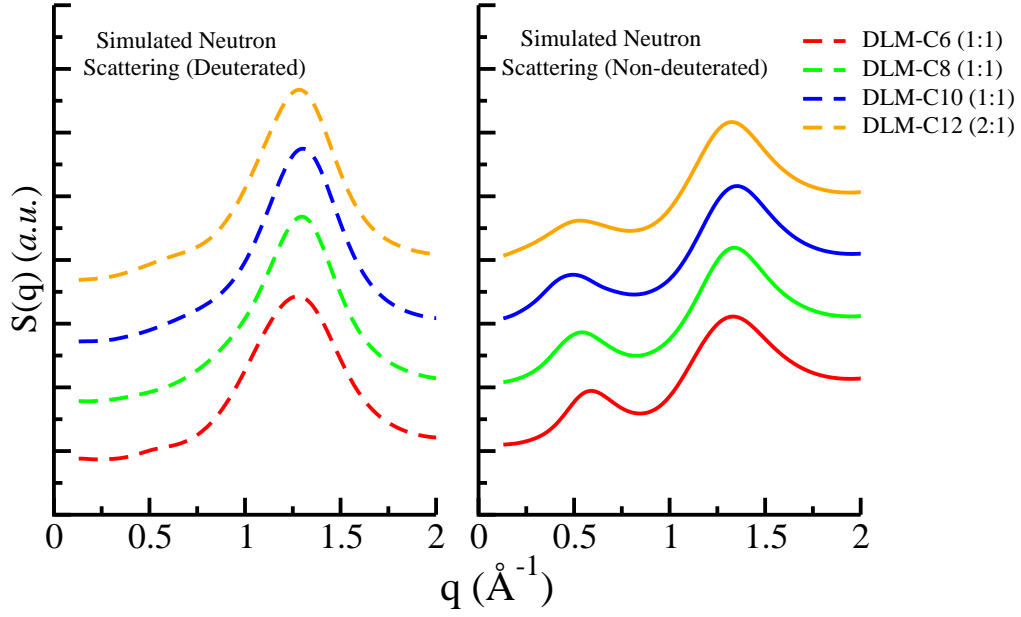

Figure S1: Simulated total neutron scattering structure function,  $S(q)$ , of the four HDESs. Left panel refers to simulated neutron scattering when all hydrogens are deuterated and right panel when hydrogens were not deuterated. These  $S(q)$ s are calculated using equation 16 from the work of Liu et al. (Ref. 71 of the main article). For clarity,  $S(q)$ s are offset vertically.

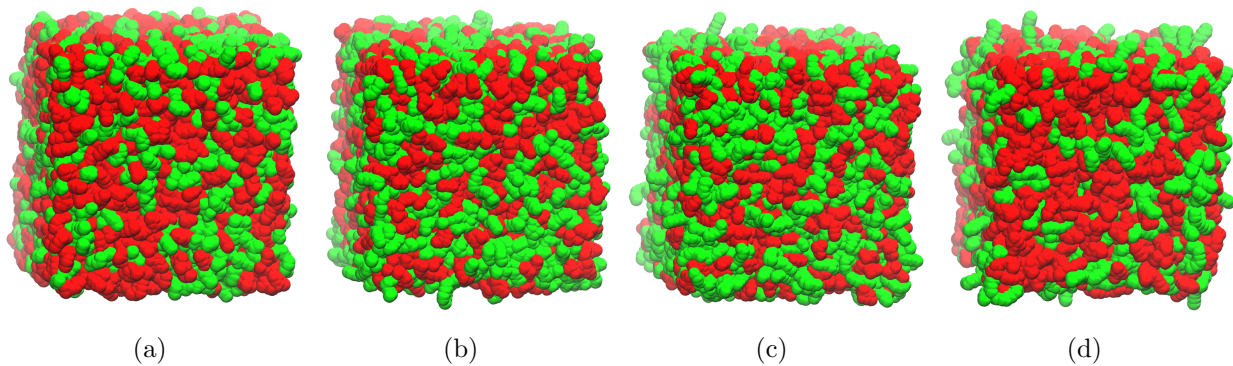

Figure S2: Equilibrium simulation cells snapshot of (a) DL-menthol:hexanoic acid (1:1), (b) DL-menthol:octanoic acid (1:1), (c) DL-menthol:decanoic acid (1:1) and (d) DL-menthol:dodecanoic acid (2:1) system. Here, red and green color refer to DL-menthol and organic acids, respectively.

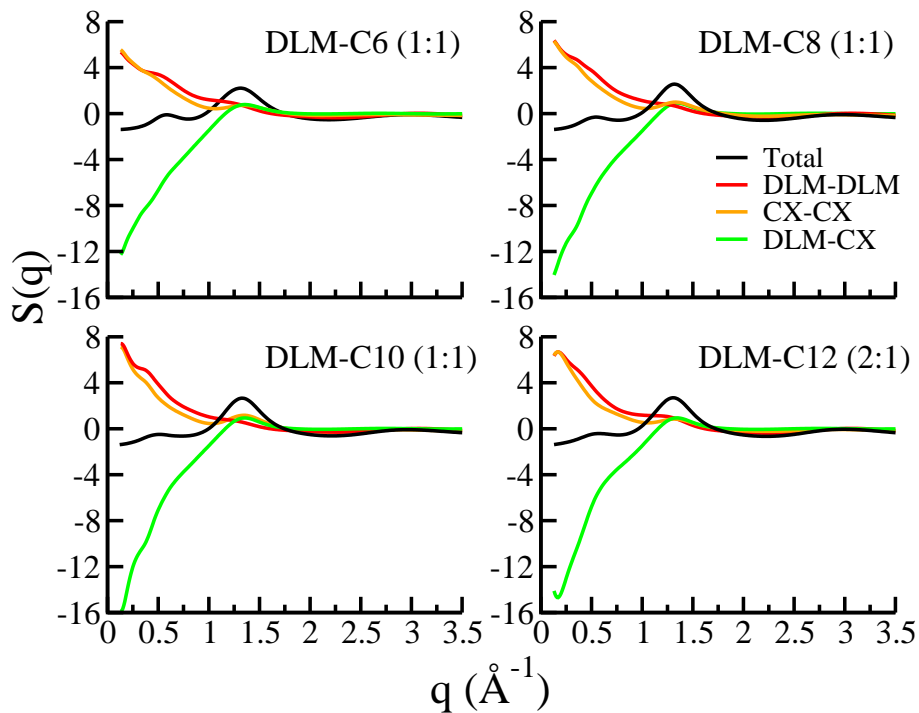

Figure S3: Simulated species wise partial X-ray scattering structure function,  $S(q)$ , of the four HDESs. CX represents organic acids where,  $X=6, 8, 10$  and  $12$ . DLM represents DL-menthol species.

**Table S1: Peak positions of first minimum ( $r_{min}$ ) and their corresponding coordination number ( $n_{coord}$ ) for different RDF pairs.**

| RDF Pair                                   | $r_{min}$ | $n_{coord}$ |
|--------------------------------------------|-----------|-------------|
| O <sub>C6</sub> -HO <sub>C6</sub>          | 0.264     | 0.502       |
| O <sub>C8</sub> -HO <sub>C8</sub>          | 0.262     | 0.506       |
| O <sub>C10</sub> -HO <sub>C10</sub>        | 0.266     | 0.518       |
| O <sub>C12</sub> -HO <sub>C12</sub>        | 0.266     | 0.360       |
| OH <sub>DLM</sub> -HO <sub>C6</sub>        | 0.266     | 0.466       |
| OH <sub>DLM</sub> -HO <sub>C8</sub>        | 0.266     | 0.461       |
| OH <sub>DLM</sub> -HO <sub>C10</sub>       | 0.266     | 0.451       |
| OH <sub>DLM</sub> -HO <sub>C12</sub>       | 0.268     | 0.307       |
| O <sub>C6</sub> -HO <sub>DLM</sub>         | 0.254     | 0.441       |
| O <sub>C8</sub> -HO <sub>DLM</sub>         | 0.254     | 0.437       |
| O <sub>C10</sub> -HO <sub>DLM</sub>        | 0.254     | 0.428       |
| O <sub>C12</sub> -HO <sub>DLM</sub>        | 0.256     | 0.595       |
| OH <sub>DLM</sub> -HO <sub>DLM</sub> (C6)  | 0.260     | 0.403       |
| OH <sub>DLM</sub> -HO <sub>DLM</sub> (C8)  | 0.260     | 0.408       |
| OH <sub>DLM</sub> -HO <sub>DLM</sub> (C10) | 0.258     | 0.408       |
| OH <sub>DLM</sub> -HO <sub>DLM</sub> (C12) | 0.260     | 0.555       |
| OH <sub>C6</sub> -HO <sub>DLM</sub>        | 0.252     | 0.040       |
| OH <sub>C8</sub> -HO <sub>DLM</sub>        | 0.252     | 0.038       |
| OH <sub>C10</sub> -HO <sub>DLM</sub>       | 0.250     | 0.036       |
| OH <sub>C12</sub> -HO <sub>DLM</sub>       | 0.252     | 0.050       |
| OH <sub>C6</sub> -HO <sub>C6</sub>         | 0.248     | 0.019       |
| OH <sub>C8</sub> -HO <sub>C8</sub>         | 0.244     | 0.017       |
| OH <sub>C10</sub> -HO <sub>C10</sub>       | 0.246     | 0.017       |
| OH <sub>C12</sub> -HO <sub>C12</sub>       | 0.248     | 0.011       |
| C <sub>6T</sub> -C <sub>6T</sub>           | 0.696     | 2.631       |
| C <sub>8T</sub> -C <sub>8T</sub>           | 0.704     | 2.601       |
| C <sub>10T</sub> -C <sub>10T</sub>         | 0.712     | 2.498       |
| C <sub>12T</sub> -C <sub>12T</sub>         | 0.724     | 1.730       |

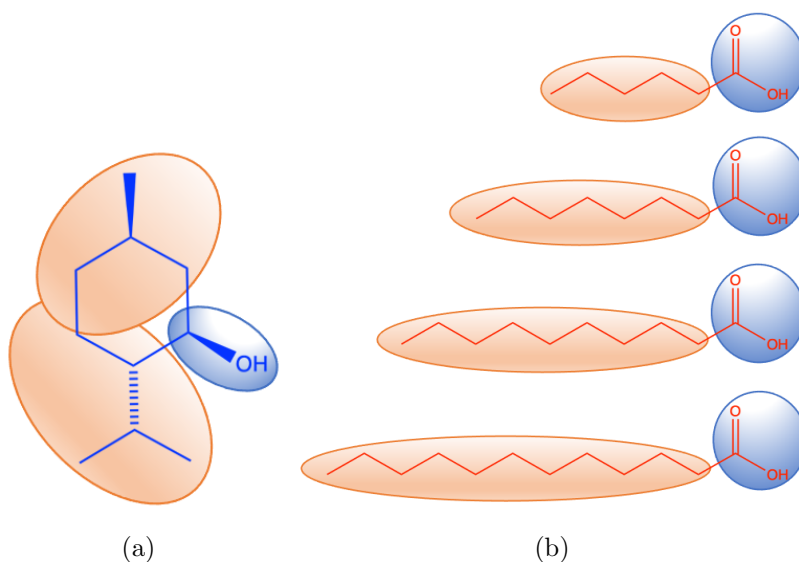

Figure S4: Chemical structures of (a) DL-menthol (DLM) (b) hexanoic (C6), octanoic (C8), decanoic (C10) and dodecanoic (C12) acids, shown from top to bottom, respectively. Polar part in HDESs are shaded in blue and refers to COOH group in acids and in DLM the OH group and carbon and hydrogen directly attached to OH. The alkyl chain in acids and other remaining atoms of DLM are referred to apolar part of HDESs, which is shaded in orange.

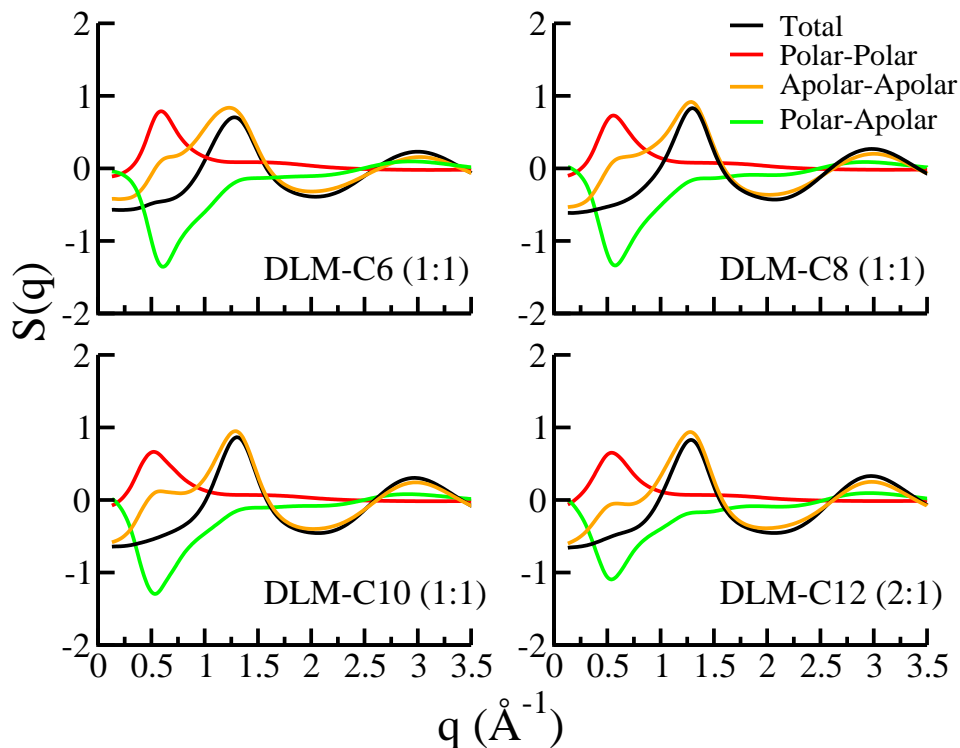

Figure S5: Simulated total and partial  $S(q)$ s without weighting the contributions with radiation-specific weights for the four HDESSs.

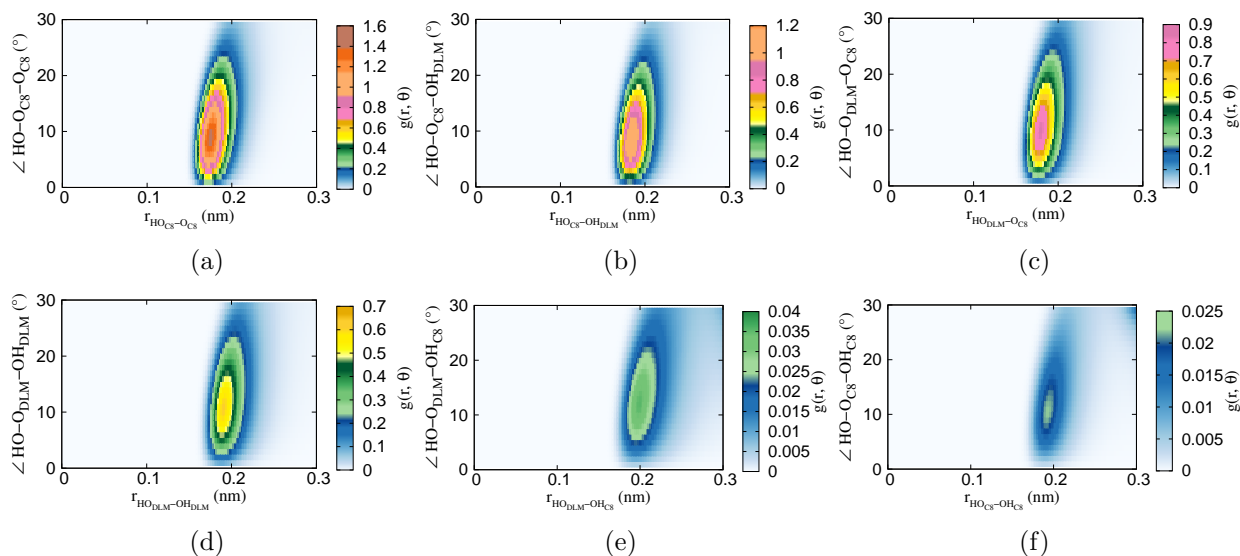

Figure S6: Angle-resolved radial distribution functions,  $g(r, \theta)$ , for H-D-A angle and H-A distance in DLM-C8 (1:1) HDES. Here,  $\text{HO}_{\text{DLM}}$  and  $\text{OH}_{\text{DLM}}$  are the hydroxyl hydrogen and oxygen atoms of DL-menthol, respectively.  $\text{OH}_{\text{C8}}$ ,  $\text{HO}_{\text{C8}}$  and  $\text{O}_{\text{C8}}$  are the hydroxyl oxygen, hydroxyl hydrogen, and, carbonyl oxygen atoms of octanoic acid, respectively.

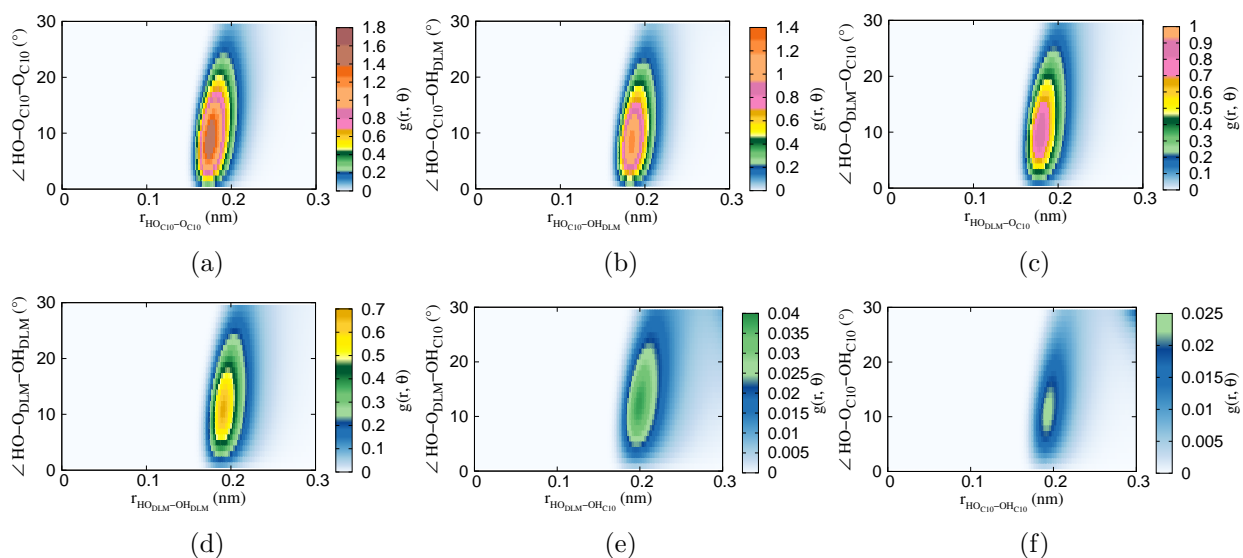

Figure S7: Angle-resolved radial distribution functions,  $g(r, \theta)$ , for H-D-A angle and H-A distance in DLM-C10 (1:1) HDES. Here,  $\text{HO}_{\text{DLM}}$  and  $\text{OH}_{\text{DLM}}$  are the hydroxyl hydrogen and oxygen atoms of DL-menthol, respectively.  $\text{OH}_{\text{C10}}$ ,  $\text{HO}_{\text{C10}}$  and  $\text{O}_{\text{C10}}$  are the hydroxyl oxygen, hydroxyl hydrogen, and, carbonyl oxygen atoms of decanoic acid, respectively.
